# Supplementary material
Source: publisher figshare collection journal article supplement (https://karger.figshare.com/ndownloader/files/22293852)
Supplement: Supplementary file 1 [file 22293852]

**Supplemental Table 1. Primers designed for qRT-PCR validation of candidate lncRNAs**

| **Gene name** | **Forward primer** | **Reverse primer** |
| --- | --- | --- |
| NONHSAT040475 | 5’AGCTAATGGTGGGACAAC3’ | 5’ TCAGGCTCTTCATTTGCAGATA3’ |
| NONHSAT142151 | 5’ CATGATCTTCTCCATACTGTCT3’ | 5’ GTGCTGCTTCCAGTTCAAT3’ |
| FR118417 | 5’CAATGTGCAGCATTCCTTTAC3’ | 5’TTAGTGAGCCCATCCTTTCT3’ |
| GAPDH | 5’GGAGCGAGATCCCTCCAAAAT3’ | 5’GGCTGTTGTCATACTTCTCATGG3’ |
